# Supplementary material for: Spinel nitride solid solutions: charting properties in the configurational space with explainable machine learning
Source: Royal Society of Chemistry journal article supplement (doi:10.1039/d2dd00038e), 2022-01-01
Supplement: d2dd00038e1.pdf [file d2dd00038e1.pdf]

## Spinel nitride solid solutions: charting properties in the configurational space via machine learning

Pablo Sánchez-Palencia,<sup>1,2</sup> Said Hamad,<sup>3</sup> Pablo Palacios,<sup>1,4</sup> Ricardo Grau-Crespo,<sup>5</sup> Keith T. Butler<sup>6\*</sup>

<sup>1</sup> Instituto de Energía Solar, ETSI Telecomunicación, Universidad Politécnica de Madrid, Ciudad Universitaria, s/n, 28040, Madrid, Spain.

<sup>2</sup> Departamento de Tecnología Fotónica y Bioingeniería, ETSI Telecomunicación, Universidad Politécnica de Madrid, Ciudad Universitaria, s/n, 28040 Madrid, Spain.

<sup>3</sup> Department of Physical, Chemical and Natural Systems, Universidad Pablo de Olavide, 41013 Sevilla, Spain.

<sup>4</sup> Departamento de Física aplicada a las Ingenierías Aeronáutica y Naval. ETSI Aeronáutica y del Espacio, Universidad Politécnica de Madrid, Pz. Cardenal Cisneros, 3, 28040 Madrid, Spain.

<sup>5</sup> Department of Chemistry, University of Reading, Reading RG6 6DX, United Kingdom.

<sup>6</sup> SciML, Scientific Computing Department, Rutherford Appleton Laboratory, Harwell OX11 0QX, United Kingdom.

\*E-mail: [keith.butler@stfc.ac.uk](mailto:keith.butler@stfc.ac.uk)

### Supplementary Material

**Table S1** Calculated values of lattice constant and bandgap for the reference compounds with the different U-values tested in comparison with experimental values. Bold values are those in better agreement with experiments.

| U value                            | Lattice constant (Å) | PBE+U bandgap (eV) | HSE bandgap (eV) |
|------------------------------------|----------------------|--------------------|------------------|
| <b>Sn<sub>3</sub>N<sub>4</sub></b> |                      |                    |                  |
| 0                                  | 9.140                | 0.240              | 1.345            |
| 1.5                                | 9.075                | 0.518              | <b>1.570</b>     |
| 2                                  | 9.051                | 0.624              | 1.657            |
| 2.5                                | <b>9.023</b>         | 0.741              | 1.752            |
| <b>Expt</b>                        | <b>9.03</b>          | -                  | <b>1.6</b>       |
| <b>Ge<sub>3</sub>N<sub>4</sub></b> |                      |                    |                  |
| 0                                  | 8.311                | 1.929              | 3.311            |
| 1.5                                | 8.257                | 2.243              | 3.463            |
| 2                                  | 8.238                | 2.295              | <b>3.496</b>     |
| 2.5                                | <b>8.217</b>         | 2.337              | 3.531            |
| <b>Expt.</b>                       | <b>8.21</b>          | -                  | <b>3.5</b>       |

**Table S2** Number of total and calculated configurations within the whole GeSn<sub>2</sub>N<sub>4</sub> configurational space for the different inversion degrees.

| Inversion degree | GGA calculations | HSE calculations | Whole space |
|------------------|------------------|------------------|-------------|
| 0                | 1                | 1                | 1           |
| 0.125            | 2                | 2                | 2           |
| 0.25             | 10               | 3                | 31          |
| 0.375            | 50               | 4                | 186         |

|              |             |           |             |
|--------------|-------------|-----------|-------------|
| 0.5          | 100         | 5         | 762         |
| 0.625        | 400         | 20        | 1337        |
| 0.75         | 300         | 15        | 1291        |
| 0.875        | 100         | 5         | 515         |
| 1            | 50          | 4         | 97          |
| <b>Total</b> | <b>1013</b> | <b>59</b> | <b>4222</b> |

**Table S3** List of the main parameters used for the three statistical models (linear regressor, gradient boosted decision tree and multilayer perceptron) employed in this work.

| <b>Linear regressor (LR)</b>                 |                                    |
|----------------------------------------------|------------------------------------|
| <b>Type of regularization</b>                | L1 (LASSO)                         |
| <b>Alpha (reg. coef.)</b>                    | $10^{-12}$                         |
| <b>Python package</b>                        | Scikit-learn                       |
| <b>Gradient boosted decision tree (GBDT)</b> |                                    |
| <b>Loss function</b>                         | Squared error                      |
| <b>Learning rate</b>                         | 0.01                               |
| <b># of estimators</b>                       | 1000                               |
| <b>Min. samples to split</b>                 | 5                                  |
| <b>Min. samples per leaf</b>                 | 1 (default)                        |
| <b>Max. depth</b>                            | 4                                  |
| <b>Python package</b>                        | Scikit-learn                       |
| <b>Multilayer perceptron (MLP)</b>           |                                    |
| <b>Loss function</b>                         | Squared error                      |
| <b>Learning rate</b>                         | $10^{-4}$                          |
| <b># of layers</b>                           | 5                                  |
| <b>Activation function</b>                   | ReLU*                              |
| <b>Interm.</b>                               | Yes                                |
| <b>Normalization</b>                         | Yes                                |
| <b>Interm. Dropout</b>                       | Yes                                |
| <b>Dropout rate</b>                          | 0.1                                |
| <b>Optimizer</b>                             | Adam (stochastic gradient descent) |
| <b>Max. epochs</b>                           | 10000                              |
| <b># samples per batch</b>                   | 32                                 |
| <b>Python package</b>                        | Tensorflow/Keras                   |

\*Linear activation function was used for final layer

**Table S4** Details of clusters with identifier number, order (k) and maximum distance between atoms in the cluster (l).

| <b>Cluster index</b> | <b>k</b> | <b>l</b> | <b>Cluster index</b> | <b>k</b> | <b>l</b> |
|----------------------|----------|----------|----------------------|----------|----------|
| <b>1</b>             | 1        | 0        | <b>18</b>            | 3        | 5.750    |
| <b>2</b>             | 1        | 0        | <b>19</b>            | 3        | 5.750    |
| <b>3</b>             | 2        | 3.130    | <b>20</b>            | 3        | 5.750    |
| <b>4</b>             | 2        | 3.670    | <b>21</b>            | 3        | 5.750    |
| <b>5</b>             | 2        | 3.833    | <b>22</b>            | 3        | 5.750    |
| <b>6</b>             | 2        | 5.421    | <b>23</b>            | 3        | 6.260    |
| <b>7</b>             | 2        | 5.750    | <b>24</b>            | 3        | 6.260    |
| <b>8</b>             | 2        | 6.260    | <b>25</b>            | 3        | 6.260    |
| <b>9</b>             | 2        | 6.260    | <b>26</b>            | 3        | 6.260    |
| <b>10</b>            | 3        | 3.130    | <b>27</b>            | 3        | 6.260    |
| <b>11</b>            | 3        | 3.670    | <b>28</b>            | 3        | 6.260    |
| <b>12</b>            | 3        | 3.670    | <b>29</b>            | 3        | 6.260    |
| <b>13</b>            | 3        | 3.833    | <b>30</b>            | 3        | 6.260    |
| <b>14</b>            | 3        | 5.421    | <b>31</b>            | 3        | 6.260    |
| <b>15</b>            | 3        | 5.421    | <b>32</b>            | 3        | 6.260    |
| <b>16</b>            | 3        | 5.421    | <b>33</b>            | 3        | 7.257    |
| <b>17</b>            | 3        | 5.421    | <b>34</b>            | 3        | 7.340    |
